# Supplementary material
Source: PubMed Central journal article supplement (PMC4455314)
Supplement: 56-5-3393-s01.pdf [file 56-5-3393-s01.pdf]

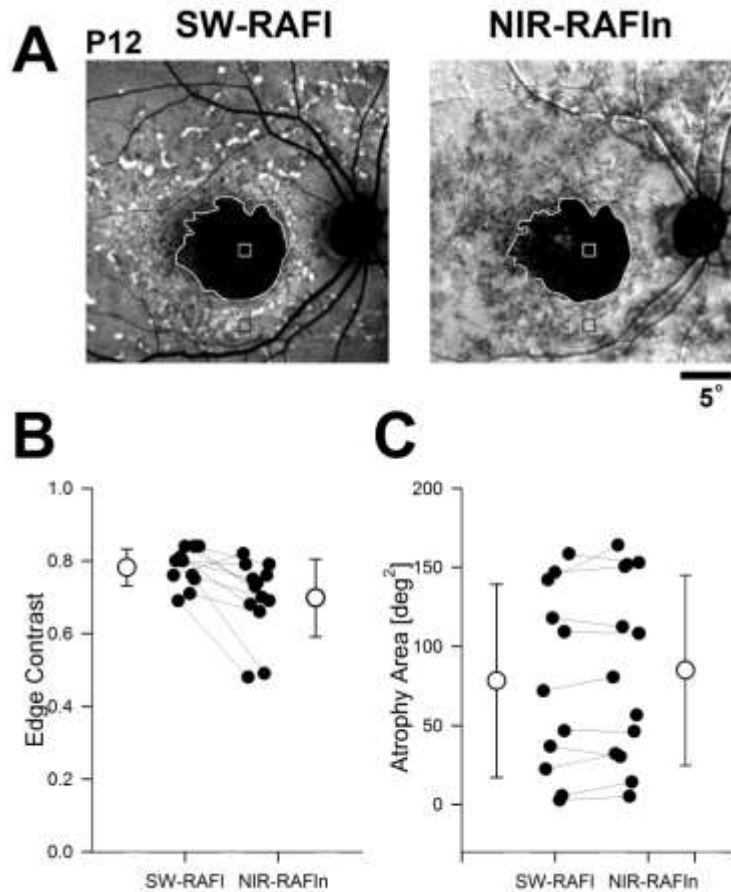

**Suppl. FIGURE 1.** Quantitative comparison of NIR-RAFI and SW-RAFI in terms of image contrast across RPE atrophy boundaries, and area of atrophy in STGD1 patients.

**(A)** A representative STGD1 patient P12 imaged with SW-RAFI and NIR-RAFI.

Atrophy is outlined (white) and two small squares are the regions used for estimating

edge contrast. **(B)** Edge contrast in individual patients (filled symbols connected) and

mean $\pm$ sd (unfilled symbols and bars). **(C)** Atrophy area in individual patients (filled

symbols connected) and mean $\pm$ sd (unfilled symbols and bars)

Supplemental Table 1. Demographic and Molecular Characteristics of the Patients

| Patient     | Age (yrs) | Gene         | Allele 1/Allele 2       | Eye | Color | Figures |
|-------------|-----------|--------------|-------------------------|-----|-------|---------|
| <b>STGD</b> |           |              |                         |     |       |         |
| P1          | 18        | <i>ABCA4</i> | W821R / N965S           | OD  | blue  | S1      |
| P2          | 19        | <i>ABCA4</i> | V256V / T1526M          | OD  | green | S1      |
| P3          | 29        | <i>ABCA4</i> | G863A / IVS35+2 T>C     | OD  | blue  | 4, S1   |
| P4          | 30        | <i>ABCA4</i> | R152X / G1961E          | OD  | blue  | 2, S1   |
| P5          | 32        | <i>ABCA4</i> | P1511 ins1ccgC / R1705Q | OS  | brown | 1, S1   |
| P6          | 34        | <i>ABCA4</i> | G863A / IVS35+2 T>C     | OS  | blue  | 1, S1   |
| P7          | 38        | <i>ABCA4</i> | T1019M / G1961E         | OS  | green | 2, S1   |
| P8          | 44        | <i>ABCA4</i> | G863A / C1490Y          | OS  | green | S1      |
| P9          | 50        | <i>ABCA4</i> | V256V / G1961E          | OS  | blue  | S1      |
| P10         | 57        | <i>ABCA4</i> | T1526M / R2030Q         | OD  | blue  | S1      |
| P11         | 60        | <i>ABCA4</i> | P1380L / G1961E         | OD  | hazel | S1      |
| P12         | 62        | <i>ABCA4</i> | R1640Q / G1961E         | OS  | green | 2, S1   |
| P13         | 69        | <i>ABCA4</i> | E1122K / G1961E         | OS  | blue  | 4, S1   |
| <b>AMD</b>  |           |              |                         |     |       |         |
| P14         | 75        | <i>n/a</i>   |                         | OS  | brown | 1       |
| P15         | 80        | <i>n/a</i>   |                         | OS  | brown | 1       |
| <b>RP</b>   |           |              |                         |     |       |         |
| P16         | 25        | <i>RPGR</i>  | G743X                   | OD  | hazel | 1       |
| P17         | 46        | <i>RPGR</i>  | E956fsX                 | OD  | hazel | 1       |
| P18         | 51        | <i>n/a</i>   |                         | OD  | brown | 4       |
| P19         | 54        | <i>RHO</i>   | G106R                   | OD  | blue  | 5       |
| P20         | 59        | <i>RHO</i>   | G106R                   | OD  | blue  | 5       |
| P21         | 60        | <i>RHO</i>   | G106R                   | OD  | blue  | 5       |
| P22         | 80        | <i>RHO</i>   | G106R                   | OD  | brown | 5       |
| <b>LCA</b>  |           |              |                         |     |       |         |
| P23         | 18        | <i>RPE65</i> | IVS2-2A>T / L341S       | OS  | hazel | 5       |
| P24         | 21        | <i>RPE65</i> | V287F / V287F           | OD  | brown | 5       |
| <b>CHM</b>  |           |              |                         |     |       |         |
| P25         | 38        | <i>CHM</i>   | R267X                   | OD  | brown | 2       |
| P26         | 53        | <i>CHM</i>   | 82delT                  | OD  | hazel | 4       |
| P27         | 58        | <i>CHM</i>   | Exon 9 del              | OD  | hazel | 2       |
